# Supplementary material for: A Spatially Explicit Dual-Isotope Approach to Map Regions of Plant-Plant Interaction after Exotic Plant Invasion
Source: PLOS journal article supplement (doi:10.1371/journal.pone.0159403), 2016-07-27
Supplement: S1 (10.1371/journal.pone.0159403.s001) [file journal.pone.0159403.s001]

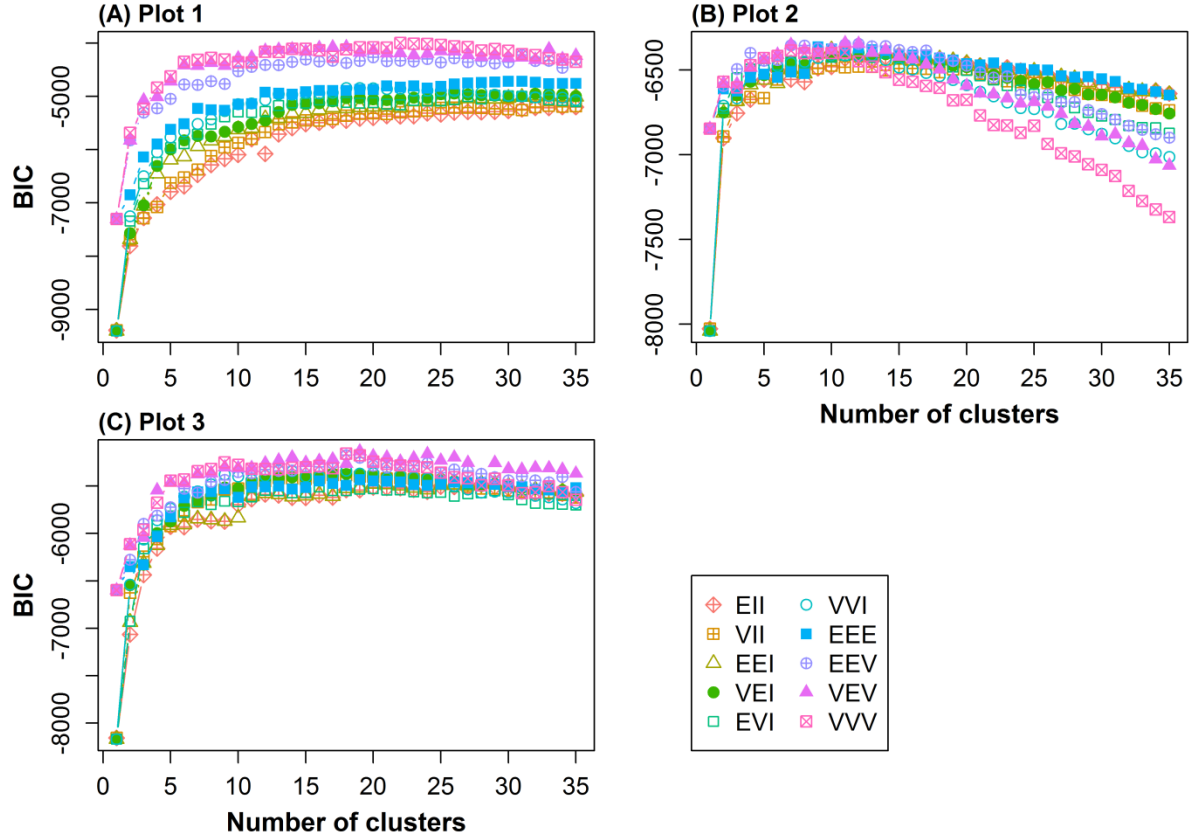

**S1 Fig. Bayesian Information Criterion (BIC) as a function of number of clusters for plots 1-3.** Ten different combinations of constraints for multivariate mixture models have been tested: EII = spherical, equal volume; VII = spherical, unequal volume; EEI = diagonal, equal volume and shape; VEI = diagonal, varying volume, equal shape; EVI = diagonal, equal volume, varying shape; VVI = diagonal, varying volume and shape; EEE = ellipsoidal, equal volume, shape, and orientation; EEV = ellipsoidal, equal volume and equal shape; VEV = ellipsoidal, equal shape; VVV = ellipsoidal, varying volume, shape, and orientation.
